# Supplementary material for: Knowledge and Perception of Stroke Management Practices Among Middle Aged Residents of Otolo Community in Nnewi North LGA, Nigeria
Source: Research Square preprint supplement (doi:10.21203/rs.3.rs-3443959/v1), 2023-10-24
Supplement: Supplementary file 1 [file c790c7d09241f53b96cff24d.docx]

**Table 10: Chi-Square Test of Age, gender, marital status, educational level and occupational status of the participants against Level of Knowledge and Perception of both Medical and Traditional Stroke Management**

| **Variables** | **Level of Significance** |
| --- | --- |
| 1. **Age and Level of Knowledge and Perception of both Medical and Traditional Stroke Management** |  |
| **Age and knowledge**   - Level of Knowledge of Medical practices - Level of Knowledge of Traditional practices   **Age and perception**   - Perception of medical stroke management - perception of traditional stroke management | X2 = 148.3; df= 95, p<0.001  X2 = 318.63; df= 190, p<0.001  X2 = 100.81; df= 76, p= 0.3  X2 = 119.6; df= 76, p= 0.01 |
| 1. **Association of Gender and Knowledge and perception of Stroke Management Practices** |  |
| **Gender and Knowledge**   - Knowledge of medical management - Knowledge of traditional management   **Gender and Perception**   - Medical Management - Traditional management | X2 = 5; df= 3.2, p= 0.67  X2 = 33.1; df= 10, p= 0.01  X2 = 4.97; df= 4, p=0.29  X2 = 2.5; df= 4, p=0.64 |
| 1. **Association of Education status and Knowledge and perception of Stroke Management Practices** |  |
| **Education and Knowledge**   - level of knowledge on medical stroke management - level of knowledge of traditional stroke management   **Education and Perception**   - perception of medical stroke management - perception of traditional stroke management | X2 = 36.4; df= 15, p=0.002  X2 = 142.27; df= 30, p=0.00  X2 =21.72; df=12, p<0.001  X2 = 83.42; df= 12, p<0.05 |
| 1. **Marital Status and the Knowledge and Perception of Respondents on Medical and Traditional Stroke Management**: |  |
| **Marital Status and Knowledge**   - level of knowledge on medical stroke management - level of knowledge of traditional stroke management   **Marital Status and Perception**   - perception of medical stroke management - perception of traditional stroke management | X2 = 67.2; df= 15, p<0.05;  (X2 = 152.71; df= 30, p<0.05;  X2 =45.31; df=12, p<0.05;  (X2 = 80.97; df= 12. p<0.05; |
| 1. **Association of Occupation and knowledge Perception of Stroke Management Practices** |  |
| **Occupation and Knowledge**   - Medical management - Traditional management   **Occupation and Perception**   - occupation and the perception of the medical management - Occupation and perception of traditional management of stroke | X2 = 67.23; df= 15, p= 0.01  X2 = 152.7; df= 30, p= 0.01  X2 = 45.5; df=12, p<0.05  X2 = 80.9; df=30, p<0.05 |
