# Supplementary material for: Knowledge and Perception of Stroke Management Practices Among Middle Aged Residents of Otolo Community in Nnewi North LGA, Nigeria
Source: Research Square preprint supplement (doi:10.21203/rs.3.rs-3443959/v1), 2023-10-24
Supplement: Supplementary file 2 [file fd2ce30709420c13e9f0f920.docx]

**Appendix 1**

QUESTIONNAIRE ON KNOWLEDGE AND PERCEPTION OF MEDICAL AND TRADITIONAL STROKE MANAGEMENT PRACTICE

SECTION A

SOCIODEMOGRAPHIC

1. Gender: MALE FEMALE
2. AGE: .........................................
3. MARITAL STATUS: SINGLE MARRIED DIVORCED SEPERATED
4. RELIGION: CHRISTIANITY TRADITIONAL ISLAM OTHERS
5. LEVEL OF EDUCATION ATTAINED: NONE PRIMARY SECONDARY TERTIARY
6. OCCUPATION: FARMING TRADING

EMPLOYED RETIRED ARTISIAN

SECTION B

KNOWLEDGE OF MEDICAL STROKE MANAGEMENT

1. PERCIEVED LEVEL OF KNOWLEDGE ABOUT MEDICAL STROKE MANAGEMENT

How do you qualify your knowledge about medical stroke management

| POOR | FAIR | GOOD |
| --- | --- | --- |
|  |  |  |

SPECIFY YOUR LEVEL OF AGGREABILITY WITH THE FOLLOWING STATEMENTS

|  | QUESTION | STRONGLY  DISAGREE | DISAGREE | NEITHER | AGREE | STRONGLY  AGREE |
| --- | --- | --- | --- | --- | --- | --- |
| 8 | Management of stroke in hospital is a time sensitive procedure |  |  |  |  |  |
| 9 | Brain imaging is not a necessary diagnostic investigation in stroke management |  |  |  |  |  |
| 10 | Tissue plasminogen activator can be used in the management of both types of stroke. |  |  |  |  |  |
| 11 | Stroke surgical procedures majorly targets the heart |  |  |  |  |  |
| 12 | There is need for regular monitoring of the blood pressure and respiratory rate of stroke patients in the hospital |  |  |  |  |  |
| 13 | Physiotherapists play a major role in hospital management of stroke patients |  |  |  |  |  |
| 14 | Physiotherapists mainly improves recovery of stroke patients through heat and electrical therapeutic devices |  |  |  |  |  |
| 15 | Physical therapy stroke management intervention should be discontinued once post-stroke patient is discharged from hospital |  |  |  |  |  |
| 16 | Management of stroke involves a multi-systematic approach by different medical specialists |  |  |  |  |  |

SECTION C

KNOWLEDGE OF TRADITIONAL STROKE MANAGEMENT

1. PERCIEVED LEVEL OF KNOWLEDGE ABOUT TRADITIONAL STROKE MANAGEMENT

How do you qualify your knowledge about traditional stroke management?

| POOR | FAIR | GOOD |
| --- | --- | --- |
|  |  |  |

SPECIFY YOUR LEVEL OF KNOWLEDGE CONFIDENCE IN THE FOLLOWING CONTEXTS

|  | QUESTION | VERY POOR | POOR | FAIR | GOOD | VERY GOOD |
| --- | --- | --- | --- | --- | --- | --- |
| 18 | Traditional practitioners that can manage stroke |  |  |  |  |  |
| 19 | Herbs employed in the traditional management of stroke |  |  |  |  |  |
| 20 | Treatment procedures employed by traditional practitioners in treatment of stroke |  |  |  |  |  |
| 21 | Duration of management of stroke in a traditional setting |  |  |  |  |  |
| 22 | Cost of stroke treatment in a traditional setting |  |  |  |  |  |

SECTION D

PERCEPTION

SPECIFY YOUR LEVEL OF AGGREABILITY WITH THE FOLLOWING STATEMENTS

|  | QUESTION | STRONGLY  DISAGREE | DISAGREE | NEITHER | AGREE | STRONGLY  AGREE |
| --- | --- | --- | --- | --- | --- | --- |
| 23 | Traditional management of stroke is cheaper than its management in the hospital |  |  |  |  |  |
| 24 | Management of stroke in the hospital gives rise to a faster recovery than in a traditional setting |  |  |  |  |  |
| 25 | Quality of care received by stroke patient in traditional stroke management is better than that received in medical stroke management institutions |  |  |  |  |  |
| 26 | Traditional stroke management is more accessible than medical stroke management |  |  |  |  |  |
| 27 | Management of stroke in a hospital is safer than its management in a traditional setting |  |  |  |  |  |
| 28 | Management of stroke in a hospital is more cost effective than its management in a traditional setting |  |  |  |  |  |

SECTION E

SOURCE OF INFORMATION

CHOOSE THE MOST APPROPRIATE ANSWER.

29. What is your predominant source of information on stroke management Practice?

1.[ ] Radio 2. [ ] Counselling from medical Specialist 3. [ ] Counselling from traditional Practitioners 4. [ ] Informal Meetings 5. [ ] Medical articles Online
